# Supplementary material for: Zebrafish Model as a Screen to Prevent Cyst Inflation in Autosomal Dominant Polycystic Kidney Disease
Source: MDPI journal article supplement (doi:10.3390/ijms22169013), 2021-08-20
Supplement: s1 [file s1]

## Supplementary Material:

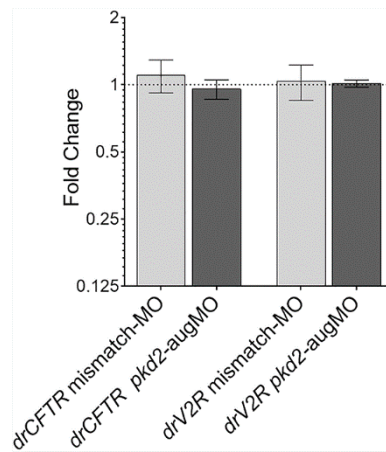

**Figure S1** - mRNA levels of V2R and CFTR. Normalised fold expression (Log2) of the two genes are presented as determined in a KV specific microarray data (unpublished data) for both mismatch-MO control (light grey bars) and *pkd2*-knockdown embryos (dark grey bars).

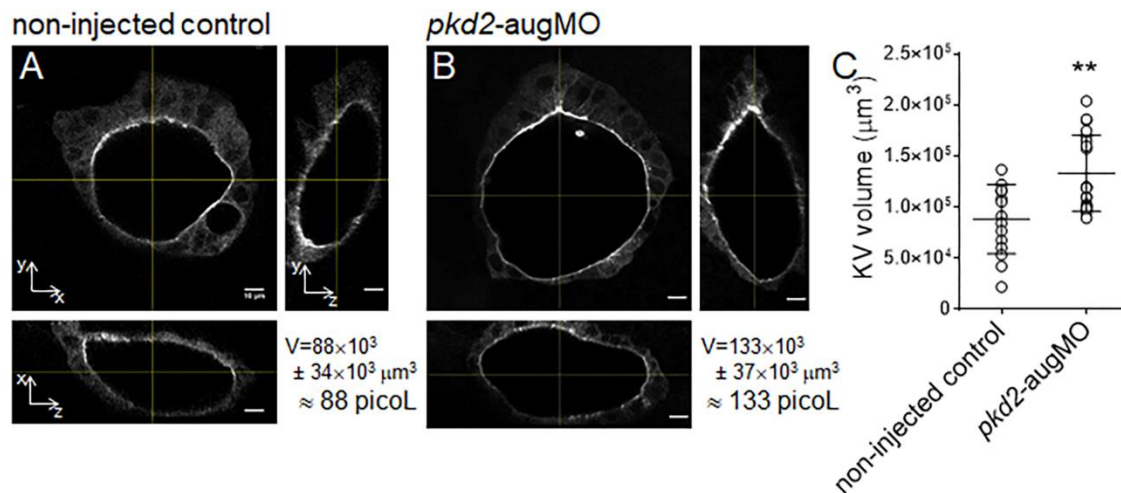

**Figure S2** – *TgBAC(cftr-GFP)pd1041* embryos KV Volume. (A, B) Confocal live-microscopy scans of the whole KV of 10-11 ss *TgBAC(cftr-GFP)pd1041* embryos. The middle focal plane along the *xy* axis and the respective orthogonal views (along *xz* and *yz* axes) are shown for the most representative (A) non-injected control and (B) *pkd2*-knockdown embryos. KV<sub>volume</sub> is indicated in  $\mu\text{m}^3$  and pL. (C) Estimated KV volumes ( $\mu\text{m}^3$ ) for non-injected control ( $n=15$ ) and *pkd2*-knockdown ( $n=20$ ) embryos. Mean $\pm$ SD are indicated. As the *pkd2*-augMO injected embryos sample did not follow a normal distribution, the Mann-Whitney test was used to compare the *pkd2*-augMO versus non-injected embryos, \*\* $p < 0.01$ . Scale bars: 10  $\mu\text{m}$ .
